# Supplementary material for: Dual functions of Macpiwi1 in transposon silencing and stem cell maintenance in the flatworm Macrostomum lignano
Source: PubMed Central journal article supplement (PMC4604429; doi:10.1261/rna.052456.115), 2015-11
Supplement: supp_052456.115_Sup_Fig1.pdf [file supp_052456.115_Sup_Fig1.pdf]

|                          | 260     | 270    | 280    | 290     | 300     | 310      | 320     |          |       |        |       |        |       |        |
|--------------------------|---------|--------|--------|---------|---------|----------|---------|----------|-------|--------|-------|--------|-------|--------|
| Smedwi-1                 | .NSSKGN | EFHENL | GKNFLT | ALTT    | FQNKFN  | MPRL     | LIIVRD  | GVGDS    | QLAFT | TKKFE  | ETDA  | VMMK   | IEKI  | YENQ   |
| Smedwi-2                 | VNSPKGR | EFHETL | GKNFNL | ALED    | FKKRYDI | LPOR     | LIVFRD  | GVGDN    | QLQFT | TKNFV  | DAMK  | PLIENI | YKNG  |        |
| D.japonica_Piwi          | .NSPKGK | EFHDTL | SGNFKA | ALTE    | FKRIYKI | LPVR     | IMVYRD  | GVGDS    | QLQFT | TKQFE  | V DAM | KPLV   | ENIY  | KENG   |
| Macpiwi-3                | ATQRH   | .GQEI  | LDSMR  | VIVQS   | QIAKY   | MQTVG    | APNV    | IFVFRD   | GVSDK | QIGEV  | QQQEV | KAIYAA | IRG   | YDPSY  |
| D.melanogaster_PIWI      | TECSA   | .FDVL  | ANTL   | WPMIAK  | ALROY   | QHEHRK   | LP      | RIIVYRD  | GVSSG | SLKQL  | FEFEV | KDII   | IEKL  | KTEY   |
| D.melanogaster_Aubergine | NEHIK   | .GOEL  | SEQM   | SVNMAC  | ALRSY   | QEQHRS   | LP      | ERILFRD  | GVGDG | QLYQV  | VVNSE | VNTL   | KDRL  | DEIY   |
| Macpiwi-1                | PIVKGGK | ELHNRL | EVGFNL | ALQK    | FREKNGD | LP       | RIILYRD | GVGDS    | MLEEV | VKNSEL | LQLK  | QSL    | SKIY  | GERM   |
| Macpiwi-2                | PIVKGGK | ELHNRL | DAGFTM | ALQK    | FREKNGE | LP       | RIILYRD | GVGDS    | MLEQV | VKNSEL | VQLK  | QSL    | SRIY  | GDRI   |
| H.sapiens_PIWIL4         | ILQRT   | .MTDV  | ADCL   | KVFM TG | ALNK    | WYKYNHD  | LP      | RIIVYRD  | GVGDG | QLKTL  | IEYEV | PQLL   | SSVAE | .SSSNT |
| A.californica_piwi1      | EYHDK   | .KAEI  | MQLG   | VLV TG  | ALRK    | FHETNQAN | PT      | RVIVYRD  | GVGDG | QLDAV  | FOSE  | KEQI   | EQA   | FRMAG  |
| H.sapiens_PIWIL3         | VIQKT   | .GEEL  | VKLE   | ICLKA   | ALDV    | WCKNESS  | MP      | HSVIVYRD | GVGDG | QLQAL  | LDHEA | AKK    | MSTYL | KT     |
| Smedwi-3                 | HLQEQ   | .DKEI  | MYVL   | QSCMLS  | LLKAY   | FEENN    | LP      | ETIFMYRD | GVSDG | QLGYV  | OKTEI | EQFF   | KVFES | .FSADY |
| H.sapiens_PIWIL2         | VFQMP   | .HQEI  | VDSL   | KLCLVG  | LKKF    | YEVNHC   | LP      | KIVIVYRD | GVSDG | QLKTL  | VANYE | IPQL   | KCFEA | .F     |
| H.sapiens_PIWIL1         | IFQDR   | .GQEL  | VDSL   | LKVLQA  | ALRA    | WNSCNEY  | MP      | HSVIVYRD | GVGDG | QLKTL  | VNYEV | PQLD   | CLS   | .IGRGY |
| A.californica_piwi2      | CIQRQ   | .GQEL  | VHGL   | QLCLTK  | GLRK    | FHADNH   | LP      | KIVIVYRD | GVGDG | QLNTL  | LADHE | VKQL   | LHRC  | FLS    |

|                          | 330    | 340  | 350    | 360     | 370   | 380   |        |        |        |        |        |      |        |     |
|--------------------------|--------|------|--------|---------|-------|-------|--------|--------|--------|--------|--------|------|--------|-----|
| Smedwi-1                 | .TL.PQ | IIVV | KKRISV | KFDG    | ..... | ANPN  | PGTVVD | EKIV   | KPNF   | YEFY   | LVSQ   | KTTK | GTASPT | YNV |
| Smedwi-2                 | FPV.PQ | IIVV | KKRVTG | TKL     | FNRG  | ..... | NNPN   | PGTVVD | KEIV   | KPNF   | YEFF   | LVSQ | R      | TTK |
| D.japonica_Piwi          | CQV.PQ | IIVV | KKRIGT | TKL     | FNRG  | ..... | DNAN   | PGTIVD | KEIV   | KPNF   | YEFF   | LVSQ | R      | TTK |
| Macpiwi-3                | .R.PK  | LVMV | QKRINQ | RLL     | QG    | ..... | NNPN   | PGTVLD | HSIT   | RP     | EMD    | FFLV | QHV    | TQ  |
| D.melanogaster_PIWI      | .LSP   | QLAY | IIVV   | TRSM    | TRF   | FLNG  | .....  | QNPP   | PGTIVD | DVIT   | LP     | ERYD | FYLV   | SQ  |
| D.melanogaster_Aubergine | KQEG   | CRM  | TFI    | VSKR    | INSR  | YFTGH | .....  | RNPV   | PGTVVD | DVIT   | LP     | ERYD | FYLV   | SQ  |
| Macpiwi-1                | .SSL   | GFKA | IIVV   | KLVSSR  | MFRK  | QG    | .....  | SQLR   | NP     | AP     | PGTVLD | DVIT | MPNF   | VDF |
| Macpiwi-2                | .SSL   | GFKA | IIVV   | KLVSSR  | LFRR  | GG    | .....  | NQLR   | NP     | AP     | PGTVLD | DVIT | MPNF   | VDF |
| H.sapiens_PIWIL4         | .S.SR  | LSV  | IIVV   | RKKCM   | PRF   | FTEMN | .....  | RTVQ   | NP     | PL     | PGTVVD | SEAT | RNEW   | YDF |
| A.californica_piwi1      | .K.PA  | LTM  | VIVV   | KKRINTR | I     | FKRAE | .....  | KVMN   | NP     | PGSV   | VDTF   | IT   | KQEW   | YDF |
| H.sapiens_PIWIL3         | .N.FT  | LAF  | IIVV   | KKRINTR | F     | LKHG  | .....  | SNFQ   | NP     | PGTVVD | VELT   | RNEW | YDF    | FVS |
| Smedwi-3                 | .K.PN  | MVY  | VVQ    | KKRINTR | L     | YVSD  | PKNKG  | QIN    | NP     | NP     | PGTIVD | HTVT | RANL   | YDF |
| H.sapiens_PIWIL2         | .Q.PK  | MVVF | VVQ    | KKISTN  | LY    | LAAP  | .....  | QNFV   | TP     | TP     | PGTVVD | HTIT | SCEW   | YDF |
| H.sapiens_PIWIL1         | .N.PR  | LTV  | IIVV   | KKRVN   | TRF   | F     | QAQSG  | .....  | GRLQ   | NP     | PGTVVD | VEVT | RP     | EW  |
| A.californica_piwi2      | .Q.PL  | ICST | VVQ    | KKRINTR | I     | FSKGD | .....  | GGVD   | NP     | PGTVVD | HTVT   | RRDR | YDF    | FVS |

|                          | 390 | 400  | 410   | 420   | 430  | 440  |     |       |      |       |       |      |    |     |
|--------------------------|-----|------|-------|-------|------|------|-----|-------|------|-------|-------|------|----|-----|
| Smedwi-1                 | LMD | TKFT | NKKT  | NEVSV | MS   | PSV  | LOQ | ITYSL | THLY | FNWM  | G     | TIRV | VP | VPH |
| Smedwi-2                 | LED | TRLL | TKK   | .GTMD | MAP  | NEL  | LOK | ITYAL | THLY | FNWM  | G     | TIRV | VP | VPV |
| D.japonica_Piwi          | LED | TRYQ | NKA   | .GII  | EAIT | PNEL | OR  | ITYTL | THLY | FNWM  | G     | TIRV | VP | VPV |
| Macpiwi-3                | VEC | .A   | ..... | .GD   | IPV  | DEI  | Q   | LTFRS | CHLY | YNWA  | G     | SIRV | PA | PC  |
| D.melanogaster_PIWI      | LYS | .S   | ..... | .MGL  | SP   | EMQ  | K   | LYKM  | CHLY | YNWS  | G     | TIRV | PA | AVC |
| D.melanogaster_Aubergine | ISD | .N   | ..... | .MGL  | NAD  | K    | LO  | MSYKM | THMY | YNYS  | G     | TIRV | PA | AVC |
| Macpiwi-1                | IED | VND  | ..... | .AN   | IK   | PD   | Q   | Q     | LT   | YKLT  | THLY  | FN   | WP | G   |
| Macpiwi-2                | IED | VND  | ..... | .AN   | IR   | PD   | Q   | Q     | LT   | YKLT  | CHLY  | FN   | WP | G   |
| H.sapiens_PIWIL4         | IYD | .D   | ..... | .NGL  | K    | PD   | H   | OR    | L    | TFKL  | CHLY  | YN   | WP | G   |
| A.californica_piwi1      | IFD | .E   | ..... | .SGL  | K    | PD   | H   | OR    | L    | TFKL  | CHLY  | YN   | WP | G   |
| H.sapiens_PIWIL3         | IYD | .T   | ..... | .IGL  | S    | PD   | T   | V     | OR   | L     | TYCL  | CHMY | YN | LP  |
| Smedwi-3                 | LCD | .N   | ..... | .SKY  | T    | PH   | Q   | V     | OL   | MAYKT | CHLY  | YN   | WP | G   |
| H.sapiens_PIWIL2         | VLN | .T   | ..... | .AN   | L    | S    | PD  | H     | OR   | L     | TFKL  | CHMY | YN | WP  |
| H.sapiens_PIWIL1         | IYD | .N   | ..... | .SGL  | K    | PD   | H   | OR    | L    | TYKLT | CHLY  | YN   | WP | G   |
| A.californica_piwi2      | VDD | .G   | ..... | .LQ   | L    | K    | PD  | H     | OR   | L     | TYKLT | THLY | YN | WP  |
