# Supplementary material for: Dual functions of Macpiwi1 in transposon silencing and stem cell maintenance in the flatworm Macrostomum lignano
Source: PubMed Central journal article supplement (PMC4604429; doi:10.1261/rna.052456.115), 2015-11

A

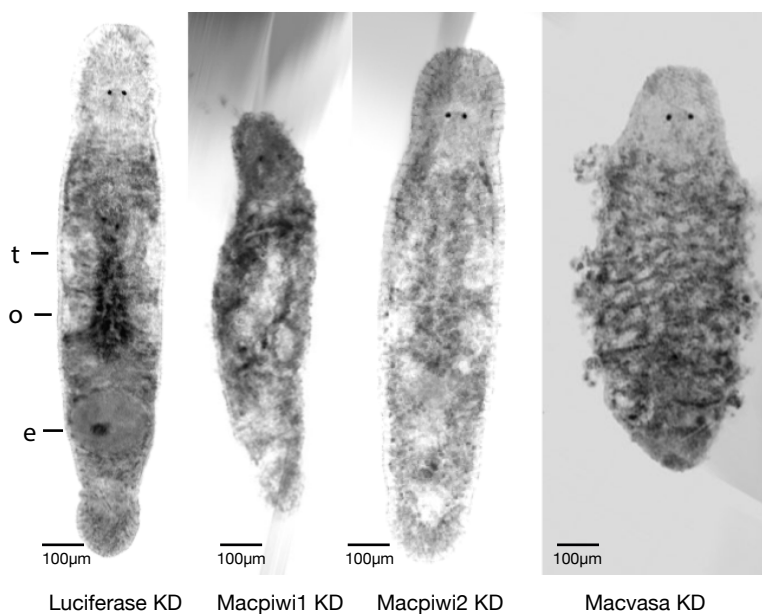

B

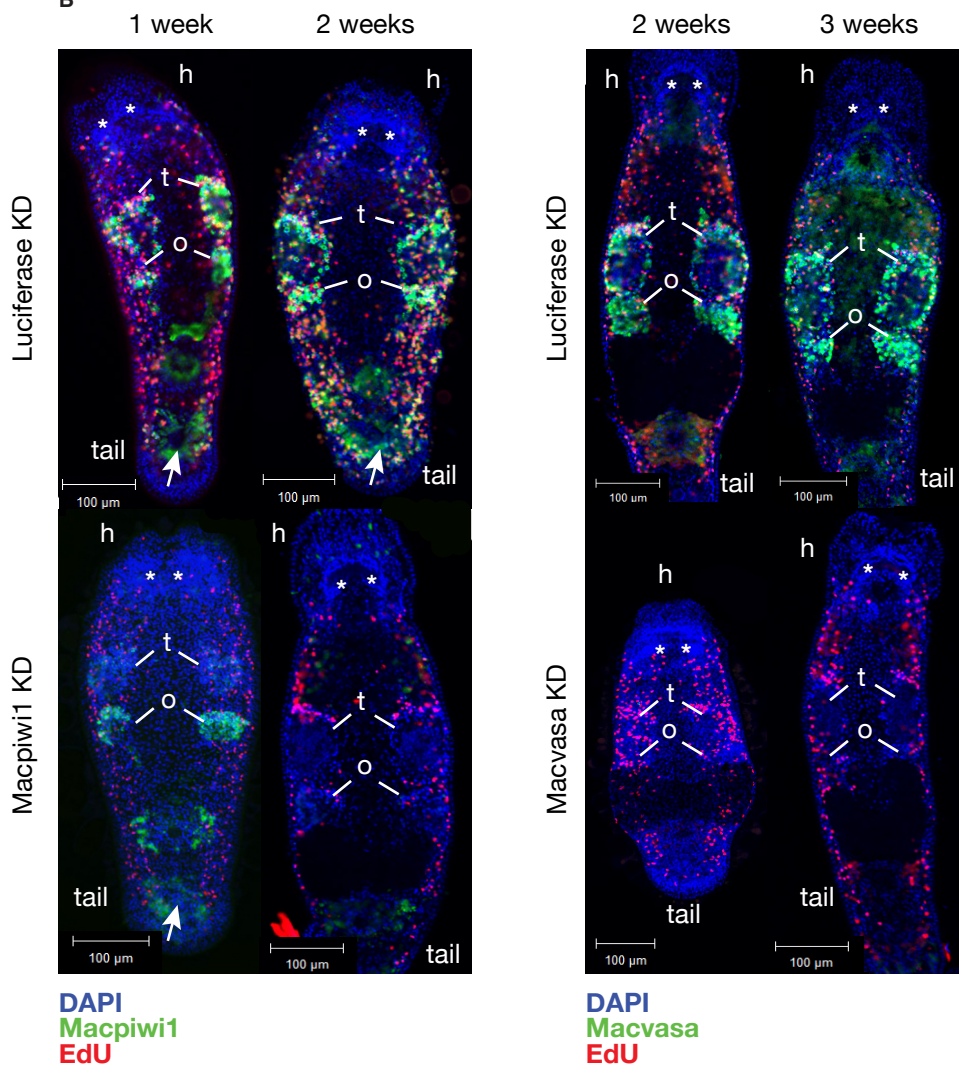

Supplement: supp_052456.115_Sup_Fig5.pdf [file supp_052456.115_Sup_Fig5.pdf]
